# Supplementary material for: Automatic Body Segment and Side Recognition of an Inertial Measurement Unit Sensor during Gait
Source: MDPI journal article supplement (doi:10.3390/s23073587), 2023-03-29
Supplement: s1 [file s1]

# Supplementary Material

**Table S1.** Feature's ranking based on importance score computed by maximum relevance and minimum redundancy method.

| Rank | Feature              | Rank | Feature          | Rank | Feature           | Rank | Feature              |
|------|----------------------|------|------------------|------|-------------------|------|----------------------|
| 1    | IQR( Gyr )           | 14   | mad( Gyr )       | 27   | NPosPeak( Acc )   | 40   | mean( Acc )          |
| 2    | kurtosis( Acc ')     | 15   | skewness( Acc )  | 28   | max( Gyr )        | 41   | max( Gyr ')          |
| 3    | ZeroCrossing( Gyr ') | 16   | median( Gyr ')   | 29   | P90( Acc )        | 42   | P10( Acc ')          |
| 4    | min( Acc )           | 17   | skewness( Gyr )  | 30   | min( Gyr ')       | 43   | P10( Acc )           |
| 5    | min( Gyr )           | 18   | max( Acc )       | 31   | MotionLess( Gyr ) | 44   | MotionLess( Acc )    |
| 6    | skewness( Gyr ')     | 19   | skewness( Acc ') | 32   | mean( Gyr )       | 45   | std( Acc )           |
| 7    | mean( Gyr ')         | 20   | skewness( Gyr ') | 33   | median( Acc ')    | 46   | IQR( Acc )           |
| 8    | min( Acc ')          | 21   | P90( Gyr ')      | 34   | std( Gyr ')       | 47   | median( Acc )        |
| 9    | NNegPeak( Gyr )      | 22   | NPosPeak( Gyr )  | 35   | NNegPeak( Acc )   | 48   | mad( Acc )           |
| 10   | P90( Gyr )           | 23   | std( Gyr )       | 36   | median( Gyr )     | 49   | mad( Acc ')          |
| 11   | kurtosis( Gyr )      | 24   | kurtosis( Acc )  | 37   | kurtosis( Gyr ')  | 50   | ZeroCrossing( Acc ') |
| 12   | P10( Gyr )           | 25   | IQR( Gyr ')      | 38   | mad( Gyr ')       | 51   | IQR( Acc ')          |
| 13   | P10( Gyr ')          | 26   | max( Acc ')      | 39   | P90( Acc ')       | 52   | std( Acc ')          |

Mad: mean absolute deviation, P10: 10th percentile, P90: 90th percentile, IQR: interquartile range, NNegPeak: number of valleys, NPosPeak: Number of peaks, MotionLess: percentage of the motion less period, ZeroCrossing: number of zero crossing.

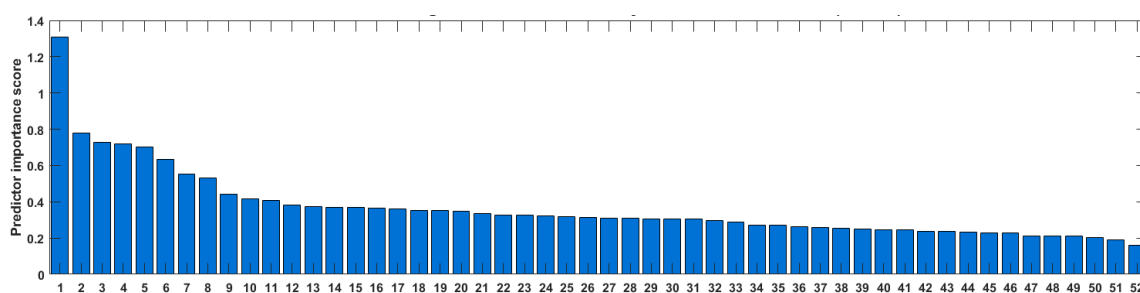

**Figure S1.** Feature's importance score computed by minimum redundancy maximum relevance method for 52 features.
